# Supplementary material for: A Multi-Step miRNA-mRNA Regulatory Network Construction Approach Identifies Gene Signatures Associated with Endometrioid Endometrial Carcinoma
Source: PubMed Central journal article supplement (PMC4929425; doi:10.3390/genes7060026), 2016-06-02
Supplement: genes-07-00026-s001.pdf [file genes-07-00026-s001.pdf]

## Supplementary Materials: A multi-step miRNA-mRNA Regulatory Network Construction Approach Identifies Gene Signatures Associated with Endometrioid Endometrial Carcinoma

Hanzhen Xiong, QiulianLi, Ruichao Chen, Shaoyan Liu, Qiongyan Lin, Zhongtang Xiong, Qingping Jiang and Linlang Guo

Table S1. Sequence of Primers for RT-PCR.

| Gene   | Name                                                                         | mRNA no.       | F-primer                  | R-primer                | Product Size |
|--------|------------------------------------------------------------------------------|----------------|---------------------------|-------------------------|--------------|
| GRB2   | growth factor receptor-bound protein 2                                       | NM_002086.4    | ACGGCTTCATTCCCAAGAACT     | TCCAAACTTGACAGAGAGGGAGA | 173          |
| PTEN   | phosphatase and tensin homolog                                               | NM_000314.4    | ACAATCTTTGTGCTGAAAGACATTA | CACCAGTTCGTCCCTTCCA     | 195          |
| NGF    | nerve growth factor                                                          | NM_002506.2    | GGGAGCGCAGCGAGTTTTG       | TTAAACAGCCTGGGGTCCAC    | 381          |
| CDC25A | Cell division cycle 25A                                                      | NM_001789.2    | CCCTACCTCAGAAGCTGTTGG     | GCAGAGTCTGCCTCTGTGT     | 217          |
| NRAS   | neuroblastoma RAS viral (v-ras) oncogene homolog                             | NM_002524.4    | GCTTGAGGTTCTTGCTGGTGT     | CGCCTGTCCTCATGTATTGGT   | 250          |
| CDKN1A | cyclin-dependent kinase inhibitor 1A (p21, Cip1)                             | NM_000389.4    | GCCGAAGTCAGTTCCTTGTG      | TCGAAGTTCATCGCTCACG     | 230          |
| CASP3  | caspase 3, apoptosis-related cysteine peptidase                              | NM_004346.3    | GCCGTGAGGAGTTAGCGAG       | CGAGATGTCATTCCAGTGCT    | 293          |
| IGF1R  | insulin-like growth factor 1 receptor                                        | NM_000875.4    | TCTATGTCCAGGCCAAAACAGG    | GTGATCTTCTCCCAGCCAC     | 235          |
| IRS2   | insulin receptor substrate 2                                                 | NM_003749.2    | TCTCAGGAAAAGCAGCGAGG      | TCACGTGATGGCGATGTAG     | 233          |
| CDKN1B | cyclin-dependent kinase inhibitor 1B (p27, Kip1)                             | NM_004064.4    | ACCCGGGAGAAAGATGTCAAA     | TGCCCTCTAGGGGTTTGTGA    | 230          |
| CPEB1  | cytoplasmic polyadenylation element binding protein 1                        | NM_001079533.1 | GCCTAAAGGGTATGTGTATCTGG   | CATGCAGAGCACCGACAAAC    | 245          |
| ACTA1  | actin, alpha 1, skeletal muscle                                              | NM_001100.3    | AATGTGCGACGAAGACGAGA      | ATGATGCCGTGCTCGATAGG    | 234          |
| SDC2   | syndecan 2                                                                   | NM_002998.3    | GCCGGTCCCTGGGGAATATG      | TCTACATCCTCATCAGCTCCCGA | 208          |
| CCNE2  | cyclin E2                                                                    | NM_057749.2    | GTAGCTGGTCTGGCGAGGTT      | TAATGCAAGGACTGATCCCCC   | 252          |
| YWHAB  | tyrosine 3-monooxygenase/tryptophan 5-monooxygenase activation protein, beta | NM_003404.4    | GGCCGCTACAAAAAGTGCAT      | CATGCCCTGTTCTGTGACT     | 187          |
| ACTB   | Beta-actin                                                                   | NM_001101.3    | CTCACCATGGATGATGATATCGC   | AGGAATCCTTCTGACCCATGC   | 163          |

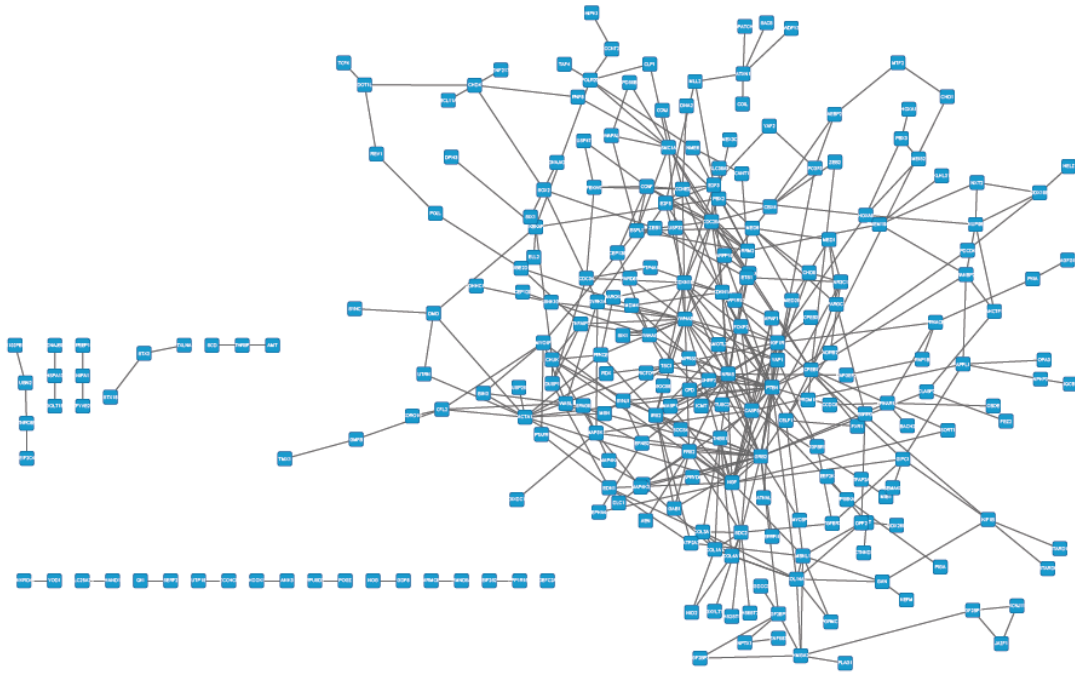

Figure S1. 61 of the potential targets possess a high score ( $\geq 5$ ).

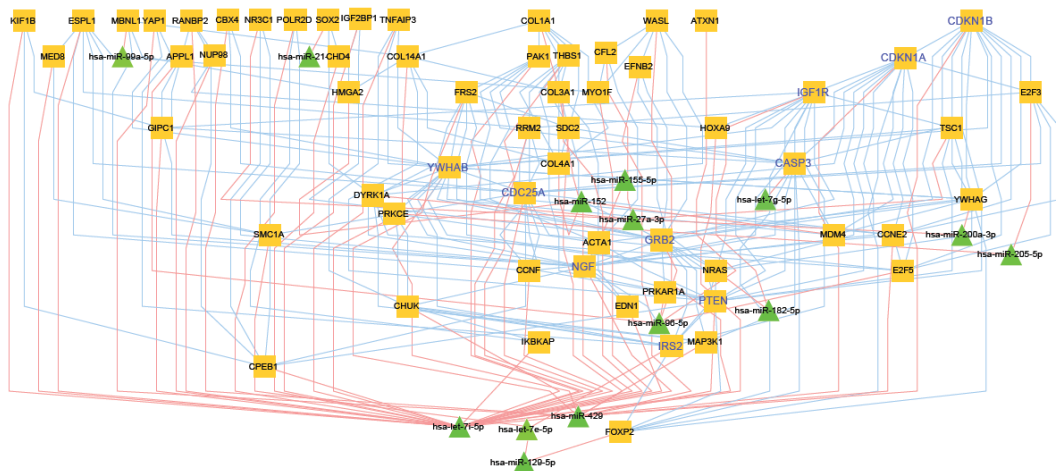

Figure S2. The interactions of 61 genes and the relationships with miRNAs.
